1 **TITLE OF THE PAPER**

2 Title: ***Unmasking the determinants of knowledge, attitude and practice of Personal***  
3 ***Protective Equipment use among Nepalese farmers using pesticides***

4 Authors: Reecha Piya<sup>1\*</sup>, Krishna G.C<sup>1</sup>, Ajay K. Rajbhandari<sup>1</sup>, Sampurna Kakchapati<sup>2</sup>

5

6

7 Affiliations:

8 <sup>1</sup>Patan Academy of Health Sciences, Lagankhel, Lalitpur, Nepal

9 <sup>2</sup>HERD International, Bhaisepati, Lalitpur, Nepal

10

11 \*Corresponding Author

12 Email: [reecha.piya@gmail.com](mailto:reecha.piya@gmail.com), [reecha.piya@outlook.com](mailto:reecha.piya@outlook.com) (RP)

13 **Title: Unmasking the determinants of knowledge, attitude and practice of Personal Protective**  
14 **Equipment use among Nepalese farmers using pesticides**

15 **Abstract**

16 Background: Farmer using commercially available chemical pesticides are at high risk to develop  
17 various pesticide-related-illnesses. To mitigate the adverse effect of pesticides, it is crucial for  
18 famers to wear Personal Protective Equipment (PPE). This study aimed to assess the factors  
19 influencing knowledge, attitude, and practice (KAP) of PPE use among farmers using pesticides in  
20 mid-hills of Nepal.

21 Methods: We conducted a cross-sectional study among 256 farmers in Kirtipur Municipality. We  
22 collected data using structured questionnaire via telephone. Bi-variate and multivariate logistic  
23 regression was done to identify the association between individual, household and farming  
24 related characteristic with knowledge, attitude, and practice of PPE use.

25 Results: The study found that the knowledge, attitude, and practice of PPE use was 53.75%,  
26 55.11%, and 47.16%, respectively. The farmers with primary level schooling (AOR= 2.63; 95% CI  
27 1.00-6.88) and secondary level schooling or higher (AOR= 4.19; 95% CI 1.64-0.68) had higher odds  
28 of having knowledge on PPE use rather than the farmers with no formal schooling. Farmers of  
29 upper lower socioeconomic status had higher odds (AOR=6.40; 95% CI 1.68-24.45) of having  
30 positive attitude towards PPE use compared to farmers of upper middle and upper socio-  
31 economic status. On the contrary, farmers with good knowledge (AOR=0.20; CI 0.09-0.48) and  
32 experience of pesticide-related-illness (AOR=0.29; 95% CI 0.13-0.65) had lower odds of having

33 positive attitude towards PPE use. Married farmers (AOR=10.63; 95% CI 1.11-101.95), farmers  
34 using pesticides for more than 10 years (AOR=5.22; 95% CI 1.27-21.43), and farmers using  
35 pesticides for 10 hours or more in their lifetime (AOR=4.86; 95% CI 1.63-14.50) had higher odds  
36 of wearing basic set of PPE while handling pesticides. However, farmers who were involved in  
37 farming for more than 10 years (AOR=0.26; 95% CI 0.07-1.03), farmers who were using pesticide  
38 applying methods other than knapsack sprayer (AOR=0.03; 95% CI 0.00-0.34), and farmers having  
39 positive attitude towards PPE use (AOR=0.28; 95% CI 0.11-0.70) had lower odds of wearing basic  
40 set of PPE while handling pesticides.

41 Conclusion: Farmers in Nepal have a positive outlook on PPE use but multitude of factors  
42 including knowledge, farming related factors and socio-economic condition have acted as barrier  
43 to its use. Tailored educational programs that not only encompasses knowledge dissemination  
44 but also cultivation of positive safety attitudes towards PPE can help increase PPE use.

## 45 **Introduction**

46 The advent of pesticides has created a new era in farming, the use of pesticides has helped in  
47 creating an increment in crop yields. This increment in crop yields has in turn helped to mitigate  
48 global food shortages created due to rapid population growth by controlling the effects of  
49 harmful pests in the farms [1]. The use of pesticides is growing and as the trend suggests that in  
50 a study conducted between 1945 - 1995 the use of pesticides had doubled every year, especially  
51 in the case of developing countries [2]. Similar is the case of Nepal, where the use of pesticides  
52 has been increasing year on year since its inception in 1952, a study shows that there is yearly

53 10-20% growth in use of pesticides in the country to reap short-term and quick benefits from the  
54 production of crops [2,3]. It is more prevalent in commercial vegetable farming in Nepal where  
55 the use of pesticides is above the national average that is 1.6 kg a.i/ha [4–6].

56 Pesticides, in general, use a mix of toxic chemicals or biological substances which neutralize pests  
57 by killing the population or by repelling them. These toxins not only are harmful to the pests but  
58 also to the ecosystem and to human health. The people who are at most risk are the farmers and  
59 field workers who are directly exposed to the pesticides during the application process [4]. Many  
60 acute and chronic diseases including diarrhoea, nausea, vomiting, asthma, cancer, Parkinson's  
61 diseases, infertility, etc. are directly linked to the exposure to such pesticides[7–9]. Such health  
62 conditions are also found to be prevalent among pesticide using farmers in Nepal [10]. It is  
63 observed that globally there are more than 3 million (1 million intentional and 2 million  
64 unintentional) cases of pesticides poisoning resulting in more than 220,000 deaths every year  
65 caused by pesticides [2]. In Nepal also, it was seen that out of 258 cases of acute pesticide  
66 poisoning, 6.2% cases were cases of occupational exposure [2].

67 But these harmful effects caused by pesticides can be mitigated. Studies have shown that the use  
68 of Personal Protective Equipment (PPE) can help in reducing health hazards created as a result of  
69 direct exposure to pesticides, especially during spraying [11,12]. PPE refers to any items like  
70 gloves, safety glasses, bodysuits, or shoes which help to protect various body parts from direct  
71 exposure to pesticides [13]. As pesticides can interact with the human body through various  
72 sources like skin, eyes or mouth, partial use of PPE cannot be deemed fully protective against  
73 pesticides [14]. In Nepal there are instances where farmers were seen using only masks or goggles

74 while dealing with fertilizers, further, there were also instances where farmers were only using  
75 long sleeve shirts and long trousers which do not eliminate the harmful effects of pesticides  
76 [7,15,16].

77 Further, there are various social determining factors which influences an individual's knowledge,  
78 attitude, and practice towards PPE use. Factors such as socio-economic status, education, and  
79 culture can all have a significant impact [17]. For instance, education and awareness raising  
80 activities can increase knowledge and foster positive attitude, eventually influencing the practice  
81 of PPE use [18]. In addition, individuals with lower income may have difficulties acquiring PPE,  
82 impacting their practice [17]. Likewise, cultural values also play an important role in shaping  
83 attitude of PPE and affecting its acceptance and use [19].

84 Several studies have been conducted in Nepal but most of them have only been concerned with  
85 the use of pesticides and its effects on farmers but the conditions relating to use of PPE, however,  
86 have been minimal [7,10,15,20–24]. The knowledge, attitude and practices of PPE use and the  
87 various factors associated with the use of PPE among farmers and field workers have not been  
88 fully explored by studies conducted in the past. Thus, this study primarily focuses on these factors  
89 and will help to better understand the risks exposure and the practices relating to use of PPE  
90 among farmers while using pesticides.

## 91 **Methods**

### 92 **Study design, population, and setting**

93 We conducted a cross-sectional study among vegetable growing farmers of Kirtipur Municipality  
94 of Nepal to identify their knowledge, attitude, practice, and associated factors of PPE use while  
95 working with pesticides.

### 96 **Sample Size**

97 The sample size for the study was calculated based on a similar study conducted in Nepal. The  
98 study reported that the proportion of farmers using combination of protective equipment is 20%  
99 [23]. At 95% confidence and 5% margin of error, the minimum sample size required for the study  
100 was calculated to be 246. However, to incorporate an anticipated 20% non-response rate, it was  
101 inflated to 296.

### 102 **Sampling Technique**

103 Considering the situation of COVID-19 pandemic, data collection was done through telephone  
104 interviews. The ward-wise list of the farmers along with their contact numbers were collected  
105 with the help of local leaders. The list was further refined by selecting only those farmers who  
106 were engaged in vegetable farming. From the list thus prepared, 296 farmers were selected  
107 randomly using computer-generated random numbers to consider for participation in the study.  
108 As data collection was telephone based, at least three attempts were made to contact the  
109 selected participants.

## 110 **Data collection Tool**

111 The study conducted data collection from July 23, 2021 to September 30, 2021 marking the  
112 recruitment period for respondents. A semi-structured questionnaire was developed after  
113 extensive literature reviews and consultation with experts. The first section of the questionnaire  
114 comprised of demographic characteristics of the participant followed by farming related details.  
115 This section was followed by questions related to knowledge, attitude, and practice regarding  
116 PPE use. The knowledge section included the harmful effects of pesticides, port of entry and  
117 importance of PPE use. The attitude section focused on perception of the farmers regarding  
118 perceived susceptibility from pesticides, perceived severity of pesticides, perceived barriers to  
119 PPE use and perceived benefits of PPE use. Lastly, the practice section centered around assessing  
120 the use of basic set of PPEs in different stages of pesticide handling.

121 Socio-economic status of the farmers was assessed using Kuppuswamy scale which is based on  
122 the scoring of three variables i.e. education of the head of the family of the study participant,  
123 occupation of the head of the family of the study participant, and monthly income of the family.  
124 Categorization of the socioeconomic status was done based on the total score obtained from the  
125 above three variables. Socioeconomic status was categorized as lower (<5), upper-lower (5-10),  
126 lower-middle (11-15), upper-middle (16-25), and upper (26-29). The lower and upper-lower  
127 category were categorized as poor, lower-middle was categorized as middle, and upper-middle  
128 and upper were categorized as rich.

129 The knowledge section comprised of 19 questions. A score of “1” was attributed for the correct  
130 answer and a score of “0” for the incorrect answer. Median score of the questionnaire was

131 calculated and a score below-median score was categorized as poor knowledge while those with  
132 equal or above-median score was categorized as good knowledge. Section of attitude included  
133 27 statements with responses documented in the form of a four-point Likert scale: Strongly  
134 agree, Agree, Disagree and Strongly Disagree. For identifying the farmers who are practicing the  
135 use of PPE, only those farmers who were using mask, gloves, and boot at the same time while  
136 mixing the pesticides, spraying the pesticides in the vegetables, cleaning spilled pesticides and  
137 disposal of the empty bottles of pesticides were considered as using basic set of PPE use while  
138 handling pesticides.

### 139 **Operational Definition**

140 Gloves, boots, and mask worn together at a same time was considered as basic set of PPEs.  
141 Activities like mixing the pesticides, spraying the pesticides in the vegetables, cleaning spilled  
142 pesticides and disposal of the empty bottles of pesticides was considered as pesticide handling.

### 143 **Statistical Analysis**

144 A data entry form was prepared in Epi-Info similar to the questionnaire. The response of the  
145 participants was extracted from an excel sheet where the data were cleaned and then exported  
146 to STATA version 13 for analysis.

147 Frequency and percentage of the background variables were calculated. For inferential statistics,  
148 bivariate analysis of the background variables was carried out with dependent variables. Odds  
149 ratio (OR), Confidence Interval (CI), and p-values were obtained to determine important  
150 candidate variables for multivariate analysis. The p- values less than 0.05 indicated the significant  
151 relationship between variables. The VIF less than 2 with a p-value of less than 0.25 from bivariate



152 analysis were kept in the multivariate analysis. The multivariate analysis of final model was  
153 carried out by controlling for both background and mediating variables. From the final model,  
154 the p-value of less than 0.05 was considered as a significant association between independent  
155 and dependent variable.

## 156 **Ethics**

157 Ethical approval was obtained from the Institutional Review Committee (IRC) of Patan Academy  
158 of Health Sciences (PAHS)- PAHS IRC Reference PHP2107221558. Before the interview, each  
159 participant was briefed about the study and its objectives. Verbal consent was obtained from all  
160 the participants. The verbal consent was recorded separately in a mobile phone recorder, and  
161 the audio files were copied to a folder in a password protected computer.

## 162 Results

163 Table 1 shows the socio-demographic and background characteristics of farmers. The median age  
164 of the respondent was 40 years. The population of female farmers were nearly twice than male  
165 farmers. Most of the farmers were married, comprising 93.68% of the total population. The  
166 ethnicity leans heavily towards advantaged ethnic groups (Brahmin, Chettri and Newar) with  
167 78.26% followed by 21.74% from disadvantaged group. More than half of the farmers had  
168 completed their secondary schooling or higher (56.52%), followed by those who completed  
169 primary school (24.9%), while small proportion (18.58%) had no formal schooling. Regarding the  
170 involvement in occupation other than farming, 40.32% of the farmers had other occupation while  
171 59.68% of the farmers were involved exclusively in farming. About the socio-economic status of  
172 the farmers, 40.32% were rich, followed by 37.94% middle and 21.74% poor.

173 The majority of farmers were involved in farming for more than 10 years (62.58%) and farming  
174 in their own land (61.26%). 54.94% were cultivating vegetables for self-consumption while  
175 45.06% of the farmers were cultivating for commercial purposes. The majority, i.e., 69.57% used  
176 pesticides in their vegetables. Among the pesticide users, 44.32% of the respondents were using  
177 pesticides for less than 5 years while 44.32% of the respondents were using it for 5 to 10 years,  
178 and 11.36% of the respondents were using pesticides for more than 10 years. Regarding the  
179 exposure of pesticide in a lifetime, 21.47% of the pesticide users were exposed to pesticides for  
180 10 hours or more in their lifetime. The majority of the farmers (90.34%) used knapsack sprayer  
181 for application of pesticides. 53.75% had good knowledge about pesticides and PPE use while  
182 55.11% had positive attitude towards PPE use. 57.31% of the farmers attended some type of

183 training related to agriculture. 42.05% of the pesticide users reported that they had experienced  
 184 some symptoms related to adverse effects of pesticide use. Among the pesticide users, 94.89%  
 185 were using at least one form of PPE while handling pesticides while only 47.16% of the farmers  
 186 were using basic set of PPE while handling pesticides.

187 Table 1: Distribution of respondents by background variables

| Background Variables                | Number (n=253) | Percent (%) |
|-------------------------------------|----------------|-------------|
| <b>Age</b>                          |                |             |
| 16-30                               | 35             | 13.83       |
| 31-45                               | 132            | 52.17       |
| 46-59                               | 62             | 24.51       |
| ≥60                                 | 24             | 9.49        |
| Median age: 40 years                |                |             |
| Interquartile Range (IQR): 17 years |                |             |
| <b>Sex</b>                          |                |             |
| Male                                | 80             | 31.62       |
| Female                              | 173            | 68.38       |
| <b>Marital status</b>               |                |             |
| Single                              | 16             | 6.32        |
| Married                             | 237            | 93.68       |
| <b>Relation with Household head</b> |                |             |
| Household head                      | 81             | 32.02       |
| Spouse                              | 158            | 62.45       |
| Others                              | 14             | 5.53        |
| <b>Ethnicity</b>                    |                |             |
| Advantaged Ethnic Group             | 198            | 78.26       |
| Disadvantaged Ethnic Group          | 55             | 21.74       |
| <b>Education of the respondent</b>  |                |             |
| No formal schooling                 | 47             | 18.58       |
| Primary School                      | 63             | 24.90       |
| Secondary school and higher         | 143            | 56.52       |

| Background Variables                               | Number (n=253) | Percent (%) |
|----------------------------------------------------|----------------|-------------|
| <b>Involved in Occupation other than farming</b>   |                |             |
| Yes                                                | 102            | 40.32       |
| No                                                 | 151            | 59.68       |
| <b>Socioeconomic Status</b>                        |                |             |
| Rich                                               | 102            | 40.32       |
| Middle                                             | 96             | 37.94       |
| Poor                                               | 55             | 21.74       |
| <b>Households with &lt;5 years children</b>        |                |             |
| Yes                                                | 76             | 30.04       |
| No                                                 | 177            | 69.96       |
| <b>Households with individual aged 60 or older</b> |                |             |
| Yes                                                | 131            | 51.78       |
| No                                                 | 122            | 48.22       |
| <b>Households with Pregnant women</b>              |                |             |
| Yes                                                | 11             | 4.35        |
| No                                                 | 242            | 95.65       |
| <b>Years involved in farming</b>                   |                |             |
| <5 years                                           | 28             | 11.07       |
| 5 to 10 years                                      | 66             | 26.09       |
| >10 years                                          | 159            | 62.85       |
| <b>Property Relationship</b>                       |                |             |
| Property holder                                    | 155            | 61.26       |
| Lease                                              | 98             | 38.74       |
| <b>Surface area of farmland</b>                    |                |             |
| <10952 sq. ft.                                     | 100            | 39.53       |
| ≥10952 sq. ft.                                     | 153            | 60.47       |
| <b>Purpose of vegetable farming</b>                |                |             |
| Self-consumption                                   | 139            | 54.94       |
| Sell                                               | 114            | 45.06       |
| <b>Pesticide use</b>                               |                |             |
| Yes                                                | 176            | 69.57       |
| No                                                 | 77             | 30.43       |

| Background Variables                                            | Number (n=253) | Percent (%) |
|-----------------------------------------------------------------|----------------|-------------|
| <b>Years of pesticides used (N=176)</b>                         |                |             |
| <5 years                                                        | 78             | 44.32       |
| 5 to 10 years                                                   | 78             | 44.32       |
| >10 years                                                       | 20             | 11.36       |
| <b>Vegetable growth in a year (N=176)</b>                       |                |             |
| 1 time                                                          | 7              | 3.98        |
| 2 times                                                         | 99             | 56.25       |
| 3 times                                                         | 70             | 39.77       |
| <b>Number of hours of pesticide exposure in lifetime(N=176)</b> |                |             |
| <10 hours                                                       | 139            | 78.53       |
| ≥10 hours                                                       | 38             | 21.47       |
| <b>Methods of applying pesticides (N=176)</b>                   |                |             |
| Knapsack sprayer                                                | 159            | 90.34       |
| Others                                                          | 17             | 9.66        |
| <b>Knowledge (N=253)</b>                                        |                |             |
| Good                                                            | 136            | 53.75       |
| Poor                                                            | 117            | 46.25       |
| <b>Attitude(N=176)</b>                                          |                |             |
| Positive                                                        | 97             | 55.11       |
| Negative                                                        | 79             | 44.89       |
| <b>Training (N=253)</b>                                         |                |             |
| Yes                                                             | 145            | 57.31       |
| No                                                              | 108            | 42.69       |
| <b>Experience of illnesses (N=176)</b>                          |                |             |
| Yes                                                             | 74             | 42.05       |
| No                                                              | 102            | 57.95       |
| <b>Use of at least one PPE while handling pesticides</b>        |                |             |
| Yes                                                             | 167            | 94.89       |
| No                                                              | 9              | 5.11        |
| <b>Basic Set of PPE use while handling pesticides</b>           |                |             |
| Yes                                                             | 83             | 47.16       |
| No                                                              | 93             | 52.84       |

188 Table 2 shows the factors associated with knowledge on PPE use among farmers in both bivariate  
 189 and multivariate analysis. Education was found to be associated with knowledge of PPE use. The  
 190 farmers who had completed their primary schooling (AOR= 2.63; 95% CI 1.00-6.88) and secondary  
 191 level of education or higher (AOR= 4.19; 95% CI 1.64-0.68) had higher odds of having good  
 192 knowledge about PPE use compared to the farmers who did not have formal education.

193 Table 2: Factors associated with knowledge of PPE use among farmers

| Background variables                | Knowledge of PPE use |                  | Unadjusted OR<br>[95% CI] | p-value | Adjusted OR<br>[95% CI] | p-value |
|-------------------------------------|----------------------|------------------|---------------------------|---------|-------------------------|---------|
|                                     | Yes (%)              | No (%)           |                           |         |                         |         |
| <b>Age</b>                          |                      |                  |                           |         |                         |         |
| 16-30                               | 19 (54.29)           | 16 (45.71)       | 1                         |         | 1                       |         |
| 31-45                               | 86 (65.15)           | 46 (34.85)       | 1.57 [0.73-3.35]          | 0.24    | 1.64 [0.69-3.90]        | 0.262   |
| 46-59                               | 24 (38.71)           | 38 (61.29)       | 0.53 [0.23-1.23]          | 0.14    | 0.73 [0.27-1.98]        | 0.541   |
| ≥60                                 | 7 (29.17)            | 70.83<br>(70.83) | 0.34 [0.12-1.05]          | 0.06    | 0.57 [0.16-2.05]        | 0.386   |
| <b>Sex</b>                          |                      |                  |                           |         |                         |         |
| Male                                | 47 (58.75)           | 33 (41.25)       | 1                         |         | 1                       |         |
| Female                              | 89 (51.45)           | 84 (48.55)       | 0.74 [0.44-1.27]          | 0.28    |                         |         |
| <b>Marital status</b>               |                      |                  |                           |         |                         |         |
| Single                              | 5 (31.25)            | 11 (68.75)       | 1                         |         | 1                       |         |
| Married                             | 131 (55.27)          | 106 (44.73)      | 2.72 [0.92-8.07]          | 0.07    | 2.12 [ 0.60-7.55]       | 0.244   |
| <b>Relation with household head</b> |                      |                  |                           |         |                         |         |
| Household head                      | 43 (53.09)           | 38 (46.91)       | 1                         |         | 1                       |         |
| Spouse                              | 86 (54.43)           | 72 (45.57)       | 1.05 [0.62-1.81]          | 0.84    |                         |         |
| Others                              | 7 (50.00)            | 7 (50.00)        | 0.88 [ 0.28-2.74]         | 0.83    |                         |         |
| <b>Ethnicity</b>                    |                      |                  |                           |         |                         |         |
| Advantaged Ethnic Group             | 108 (54.55)          | 90 (45.45)       | 1                         |         | 1                       |         |
| Disadvantaged Ethnic Group          | 28 (50.91)           | 27 (49.09)       | 0.86 [0.48-1.57]          | 0.632   |                         |         |
| <b>Education of the respondent</b>  |                      |                  |                           |         |                         |         |

|                                                    |             |             |                   |        |                  |       |
|----------------------------------------------------|-------------|-------------|-------------------|--------|------------------|-------|
| No formal schooling                                | 9 (19.15)   | 38 (80.85)  | 1                 |        | 1                |       |
| Primary School                                     | 31 (49.21)  | 32 (50.79)  | 4.09 [1.70-9.85]  | 0.002  | 2.63 [1.00-6.88] | 0.049 |
| Secondary school and higher                        | 96 (67.13)  | 47 (32.87)  | 8.62 [3.85-19.31] | <0.001 | 4.19 [1.64-0.68] | 0.003 |
| <b>Involved in occupation other than farming</b>   |             |             |                   |        |                  |       |
| Yes                                                | 73 (48.34)  | 78 (51.66)  | 1                 |        | 1                |       |
| No                                                 | 63 (61.76)  | 39 (38.24)  | 1.73 [1.04-2.88]  | 0.036  | 1.47 [0.82-2.64] | 0.197 |
| <b>Socioeconomic status</b>                        |             |             |                   |        |                  |       |
| Rich                                               | 67 (65.69)  | 35 (34.31)  | 1                 |        | 1                |       |
| Middle                                             | 49 (51.04)  | 47 (48.96)  | 0.54 [0.31-0.96]  | 0.037  | 0.64 [0.33-1.24] | 0.185 |
| Poor                                               | 20 (36.36)  | 35 (63.64)  | 0.30 [0.15-0.59]  | 0.001  | 0.61 [0.27-1.41] | 0.250 |
| <b>Households with &lt;5 years children</b>        |             |             |                   |        |                  |       |
| No                                                 | 96 (54.24)  | 81 (45.76)  | 1                 |        | 1                |       |
| Yes                                                | 40 (52.63)  | 36 (47.37)  | 0.94 [0.55-1.61]  | 0.814  |                  |       |
| <b>Households with individual aged 60 or older</b> |             |             |                   |        |                  |       |
| No                                                 | 64 (52.46)  | 58 (47.54)  | 1                 |        | 1                |       |
| Yes                                                | 72 (54.96)  | 59 (45.04)  | 1.11 [0.67-1.81]  | 0.69   |                  |       |
| <b>Households with Pregnant women</b>              |             |             |                   |        |                  |       |
| No                                                 | 132 (54.55) | 110 (45.45) | 1                 |        | 1                |       |
| Yes                                                | 4 (36.36)   | 7 (63.64)   | 0.48 [0.14-1.67]  | 0.25   | 0.55 [0.13-2.33] | 0.414 |
| <b>Years involved in farming</b>                   |             |             |                   |        |                  |       |
| <5 years                                           | 14 (50.00)  | 14 (50.00)  | 1                 |        | 1                |       |
| 5 to 10 years                                      | 41 (62.12)  | 25 (37.88)  | 1.64 [0.67-4.00]  | 0.28   |                  |       |
| >10 years                                          | 81 (50.94)  | 78 (49.06)  | 1.04 [0.47-2.32]  | 0.93   |                  |       |
| <b>Property Relationship</b>                       |             |             |                   |        |                  |       |
| I am the owner                                     | 80 (51.61)  | 75 (48.39)  | 1                 |        | 1                |       |
| I took the land in lease                           | 56 (57.14)  | 42 (42.86)  | 1.25 [0.75-2.08]  | 0.39   |                  |       |
| <b>Surface area of farmland</b>                    |             |             |                   |        |                  |       |
| <10952 sq. ft.                                     | 42 (42.00)  | 58 (58.00)  | 1                 |        | 1                |       |
| ≥10952 sq. ft.                                     | 94 (61.44)  | 59 (38.56)  | 2.2 [1.32-3.68]   | 0.003  | 1.40 [0.75-2.63] | 0.290 |
| <b>Purpose of vegetable farming</b>                |             |             |                   |        |                  |       |
| Self-consumption                                   | 63 (45.32)  | 76 (54.68)  | 1                 |        | 1                |       |
| Sell                                               | 73 (64.04)  | 41 (35.96)  | 2.15 [1.29-3.57]  | 0.003  | 1.80 [0.97-3.31] | 0.060 |

| <b>Years of pesticides used</b>              |            |            |                  |       |                  |       |
|----------------------------------------------|------------|------------|------------------|-------|------------------|-------|
| <5 years                                     | 45 (57.69) | 33 (42.31) | 1                |       |                  | 1     |
| 5 to 10 years                                | 45 (57.69) | 33 (42.31) | 1 [0.53-1.89]    | 1.00  |                  |       |
| >10 years                                    | 11 (55.00) | 9 (45.00)  | 0.90 [0.33-2.41] | 0.83  |                  |       |
| <b>Times of vegetable grown in a year</b>    |            |            |                  |       |                  |       |
| 1 time                                       | 5 (71.43)  | 2 (28.57)  | 1                |       |                  | 1     |
| 2 times                                      | 59 (59.60) | 40 (40.40) | 0.59 [0.11-3.19] | 0.54  |                  |       |
| 3 times                                      | 37 (52.86) | 33 (47.14) | 0.45 [0.08-2.47] | 0.36  |                  |       |
| <b>Number of hours of pesticide exposure</b> |            |            |                  |       |                  |       |
| <10 hours                                    | 77 (55.80) | 61 (44.20) | 1                |       |                  | 1     |
| ≥10 hours                                    | 24 (63.16) | 14 (36.84) | 1.36 [0.65-2.85] | 0.42  |                  |       |
| <b>Methods of applying pesticides</b>        |            |            |                  |       |                  |       |
| Knapsack sprayer                             | 93 (58.49) | 66 (41.51) | 1                |       |                  | 1     |
| Others                                       | 8 (47.06)  | 9 (52.94)  | 0.63 [0.23-1.72] | 0.37  |                  |       |
| <b>Training</b>                              |            |            |                  |       |                  |       |
| No                                           | 53 (49.07) | 55 (50.93) | 1                |       |                  | 1     |
| Yes                                          | 83 (57.24) | 62 (42.76) | 1.39 [0.84-2.29] | 0.199 | 1.26 [0.71-2.25] | 0.432 |
| <b>Experience of illnesses (N=185)</b>       |            |            |                  |       |                  |       |
| No                                           | 55 (53.92) | 47 (46.08) | 1                |       |                  | 1     |
| Yes                                          | 46 (62.16) | 28 (37.84) | 1.40 [0.76-2.58] | 0.276 |                  |       |

194

195 Table 3 shows the factors associated with attitude towards PPE use among farmers in both  
 196 bivariate and multivariate analysis. Socioeconomic status, knowledge with the farmers and  
 197 experience of illness were found to be associated with attitude of farmers towards PPE use. The  
 198 farmers belonging to the upper lower (IV) category (AOR=6.40; 95% CI 1.68-24.45) had higher  
 199 odds of having positive attitude towards PPE use than the farmers belonging to upper and upper  
 200 middle category. However, the farmers with good knowledge of PPE use had lower odds of having  
 201 positive attitude towards PPE use (AOR=0.20; CI 0.09-0.48) than the farmers with poor



202 knowledge. Likewise, the farmers who had previous experience of illness related to pesticide use  
 203 had lower odds of having positive attitude towards PPE use (AOR=0.29; 95% CI 0.13-0.65) than  
 204 those farmers who did not experience any illnesses.

205 Table3: Factors associated with Attitude towards PPE use among farmers

| Background Variables                | Attitude towards PPE use |            | Unadjusted OR<br>[95% CI] | p-value | Adjusted OR<br>[95% CI] | p-value |
|-------------------------------------|--------------------------|------------|---------------------------|---------|-------------------------|---------|
|                                     | Yes (%)                  | No (%)     |                           |         |                         |         |
| <b>Age</b>                          |                          |            |                           |         |                         |         |
| 16-30                               | 20 (71.43)               | 8 (28.57)  | 1                         |         |                         |         |
| 31-45                               | 38 (42.22)               | 52 (57.78) | 0.29 [0.12-0.73]          | 0.01    | 0.92 [0.27-3.17]        | 0.89    |
| 46-59                               | 28 (66.67)               | 14 (33.33) | 0.80 [0.28-2.27]          | 0.67    | 1.29 [0.31-5.46]        | 0.73    |
| ≥60                                 | 11 (68.75)               | 5 (31.25)  | 0.88 [0.23-3.35]          | 0.85    | 1.24 [0.21-7.46]        | 0.81    |
| <b>Sex</b>                          |                          |            |                           |         |                         |         |
| Male                                | 31 (53.45)               | 27 (46.55) | 1                         |         | 1                       |         |
| Female                              | 66 (55.93)               | 52 (44.07) | 1.11 [0.59-2.08]          | 0.75    |                         |         |
| <b>Marital status</b>               |                          |            |                           |         |                         |         |
| Single                              | 6 (60.00)                | 4 (40.00)  | 1                         |         | 1                       |         |
| Married                             | 91 (54.82)               | 75 (45.18) | 0.81 [0.22-2.97]          | 0.75    |                         |         |
| <b>Relation with household head</b> |                          |            |                           |         |                         |         |
| Household head                      | 31 (53.45)               | 27 (46.55) | 1                         |         | 1                       |         |
| Spouse                              | 63 (56.76)               | 48 (43.24) | 1.14 [0.60-2.16]          | 0.68    |                         |         |
| Others                              | 3 (42.86)                | 4 (57.14)  | 0.65 [0.13-3.18]          | 0.60    |                         |         |
| <b>Ethnicity</b>                    |                          |            |                           |         |                         |         |
| Advantaged Ethnic Group             | 73 (53.28)               | 64 (46.72) | 1                         |         | 1                       |         |
| Disadvantaged Ethnic Group          | 24 (61.54)               | 15 (38.46) | 1.40 [0.68-2.90]          | 0.36    |                         |         |
| <b>Education of the respondent</b>  |                          |            |                           |         |                         |         |
| No formal schooling                 | 22 (81.48)               | 5 (18.52)  | 1                         |         | 1                       |         |
| Primary School                      | 26 (65.00)               | 14 (35.00) | 0.42 [0.13-1.36]          | 0.148   | 0.43 [0.09-1.86]        | 0.26    |
| Secondary school and higher         | 49 (44.95)               | 60 (55.05) | 0.19 [0.07-0.53]          | 0.002   | 0.42 [0.11-1.61]        | 0.21    |

|                                                    |            |            |                   |        |                  |       |
|----------------------------------------------------|------------|------------|-------------------|--------|------------------|-------|
| <b>Involved in occupation other than farming</b>   |            |            |                   |        |                  |       |
| Yes                                                | 63 (57.80) | 46 (42.20) | 1                 |        | 1                |       |
| No                                                 | 34 (50.75) | 33 (49.25) | 0.75 [0.41-1.39]  | 0.362  |                  |       |
| <b>Socioeconomic Status</b>                        |            |            |                   |        |                  |       |
| Rich                                               | 27 (37.50) | 45 (62.50) | 1                 |        | 1                |       |
| Middle                                             | 38 (57.58) | 28 (42.42) | 2.26 [1.14-4.48]  | 0.02   | 2.06 [0.84-5.06] | 0.12  |
| Poor                                               | 32(84.21)  | 6 (15.79)  | 8.88 [3.29-24.02] | <0.001 | 6.40 [1.68-24.4] | 0.01  |
| <b>Households with &lt;5 years children</b>        |            |            |                   |        |                  |       |
| No                                                 | 64 (52.03) | 59 (47.97) | 1                 |        | 1                |       |
| Yes                                                | 33 (62.26) | 20 (37.74) | 1.52 [0.79-2.94]  | 0.21   | 2.18 [0.89-5.36] | 0.09  |
| <b>Households with individual aged 60 or older</b> |            |            |                   |        |                  |       |
| No                                                 | 51 (62.96) | 30 (37.04) | 1                 |        | 1                |       |
| Yes                                                | 46 (48.42) | 49 (51.58) | 0.55 [0.30-1.01]  | 0.05   | 0.62 [0.27-1.42] | 0.261 |
| <b>Households with pregnant women</b>              |            |            |                   |        |                  |       |
| No                                                 | 91 (55.15) | 74 (44.85) | 1                 |        | 1                |       |
| Yes                                                | 6 (54.55)  | 5 (45.45)  | 0.98 [0.29-3.32]  | 0.97   |                  |       |
| <b>Years involved in farming</b>                   |            |            |                   |        |                  |       |
| <5 years                                           | 15 (60.00) | 10 (40.00) | 1                 |        | 1                |       |
| 5 to 10 years                                      | 28 (57.14) | 21 (42.86) | 0.89 [0.33-2.37]  | 0.81   |                  |       |
| >10 years                                          | 54 (52.94) | 48 (47.06) | 0.75 [0.32-1.83]  | 0.53   |                  |       |
| <b>Property Relationship</b>                       |            |            |                   |        |                  |       |
| I am the owner                                     | 55 (56.12) | 43 (43.88) | 1                 |        | 1                |       |
| I took the land in lease                           | 42 (53.85) | 36 (46.15) | 0.91 [0.50-1.66]  | 0.76   |                  |       |
| <b>Surface area of farmland</b>                    |            |            |                   |        |                  |       |
| <10952 sq. ft.                                     | 34 (62.96) | 20 (37.04) | 1                 |        | 1                |       |
| ≥10952 sq. ft.                                     | 63 (51.64) | 59 (48.36) | 0.63 [0.33-1.21]  | 0.17   | 1.16 [0.47-2.87] | 0.74  |
| <b>Purpose of vegetable farming</b>                |            |            |                   |        |                  |       |
| Self-consumption                                   | 44 (55.70) | 35 (44.30) | 1                 |        | 1                |       |
| Sell                                               | 53 (54.64) | 44 (45.36) | 0.96 [0.53-1.74]  | 0.89   |                  |       |
| <b>Years of pesticides used</b>                    |            |            |                   |        |                  |       |
| <5 years                                           | 47 (60.26) | 31 (39.74) | 1                 |        | 1                |       |
| 5 to 10 years                                      | 41 (52.56) | 37 (47.44) | 0.73 [0.39-1.38]  | 0.33   | 0.83 [0.35-1.96] | 0.67  |
| >10 years                                          | 9 (45.00)  | 11(55.00)  | 0.54 [0.20-1.45]  | 0.22   | 1.02 [0.29-3.61] | 0.98  |

| <b>Times of vegetable grown in a year</b>    |            |            |                  |        |                  |        |
|----------------------------------------------|------------|------------|------------------|--------|------------------|--------|
| 1 time                                       | 5 (71.43)  | 2 (28.57)  | 1                |        | 1                |        |
| 2 times                                      | 61 (61.62) | 38 (38.38) | 0.64 [0.12-3.48] | 0.61   | 0.47 [0.07-3.22] | 0.44   |
| 3 times                                      | 31(44.29)  | 39 (55.71) | 0.32 [0.06-1.75] | 0.19   | 0.21 [0.03-1.48] | 0.12   |
| <b>Number of hours of pesticide exposure</b> |            |            |                  |        |                  |        |
| <10 hours                                    | 78 (56.52) | 60 (43.48) | 1                |        | 1                |        |
| ≥10 hours                                    | 19 (50.00) | 19 (50.00) | 0.77 [0.37-1.58] | 0.48   |                  |        |
| <b>Methods of applying pesticides</b>        |            |            |                  |        |                  |        |
| Knapsack sprayer                             | 89 (55.97) | 70 (44.03) | 1                |        | 1                |        |
| Others                                       | 8 (47.06)  | 9 (52.94)  | 0.70 [0.26-1.91] | 0.48   |                  |        |
| <b>Knowledge</b>                             |            |            |                  |        |                  |        |
| Poor                                         | 57 (76.00) | 18 (24.00) | 1                |        | 1                |        |
| Good                                         | 40 (39.60) | 61 (60.40) | 0.21 [0.11-0.40] | <0.001 | 0.20 [0.09-0.48] | <0.001 |
| <b>Training</b>                              |            |            |                  |        |                  |        |
| No                                           | 47 (67.14) | 23 (32.86) | 1                |        | 1                |        |
| Yes                                          | 50 (47.17) | 56 (52.83) | 0.44 [0.23-0.82] | 0.01   | 0.55 [0.24-1.23] | 0.14   |
| <b>Experience of illnesses (N=185)</b>       |            |            |                  |        |                  |        |
| No                                           | 69 (67.65) | 33 (32.35) | 1                |        | 1                |        |
| Yes                                          | 28 (37.84) | 46 (62.16) | 0.29 [0.16-0.54] | <0.001 | 0.29 [0.13-0.65] | 0.003  |

206

207 Table 4 shows the factors associated with practice on PPE use among farmers in both bivariate  
 208 and multivariate analysis. Marital status, years involved in farming, years of pesticide use,  
 209 number of hours of pesticide exposure, methods of applying pesticides, and attitude towards PPE  
 210 use were found to be associated with practice of PPE use.

211 The farmers who were married had higher odds of wearing PPE while working with pesticides  
 212 (AOR=10.63; 95% CI 1.11-101.95) compared to unmarried farmers. The farmers who were using  
 213 pesticides in their vegetables for more than 10 years were had higher odds of wearing PPE while  
 214 working with pesticides (AOR=5.22; 95% CI 1.27-21.43) than those farmers who were using

215 pesticides for less than 5 years. The farmers who were exposed to pesticides for 10 hours or more  
216 in their lifetime had higher odds of wearing PPE while working with pesticides (AOR=4.86; 95%  
217 CI 1.63-14.50) than the farmers who were exposed to pesticides for less than 10 hours in their  
218 lifetime. In contrast, the farmers who were involved in vegetable farming for more than 10 years  
219 had lower odds of using PPE while working with pesticides (AOR=0.26; 95% CI 0.07-1.03) than  
220 those farmers who had been involved in farming for less than 5 years. The farmers who were  
221 using other pesticide application methods other than knapsack sprayer had lower odds of  
222 wearing PPE while working with pesticides (AOR=0.03; 95% CI 0.00-0.34) than those farmers  
223 using knapsack sprayer. The farmers who had positive attitude towards PPE use had lower odds  
224 of wearing PPE while working with pesticides (AOR=0.28; 95% CI 0.11-0.70) than those having  
225 negative attitude towards PPE use.

226

227 Table 4: Factors associated with Practice of PPE use among farmers

| Background Variables                 | Practice of PPE use while handling pesticides |           | Unadjusted OR [95% CI] | p-value | Adjusted OR [95% CI] | p-value |
|--------------------------------------|-----------------------------------------------|-----------|------------------------|---------|----------------------|---------|
|                                      | Yes (%)                                       | No (%)    |                        |         |                      |         |
| <b>Age</b>                           |                                               |           |                        |         |                      |         |
| 16-30                                | 15(53.57)                                     | 13(46.43) | 1                      |         |                      |         |
| 31-45                                | 44(48.89)                                     | 46(51.11) | 0.83 [0.35-1.94]       | 0.67    |                      |         |
| 46-59                                | 18(42.86)                                     | 24(57.14) | 0.65 [0.25-1.70]       | 0.38    |                      |         |
| ≥60                                  | 6(37.50)                                      | 10(62.50) | 0.52 [0.15-1.82]       | 0.31    |                      |         |
| <b>Sex</b>                           |                                               |           |                        |         |                      |         |
| Male                                 | 29(50)                                        | 29(50)    | 1                      |         |                      |         |
| Female                               | 54(45.76)                                     | 64(54.24) | 0.84 [0.45-1.53]       | 0.59    |                      |         |
| <b>Marital status</b>                |                                               |           |                        |         |                      |         |
| Single                               | 1(10)                                         | 9(90)     | 1                      |         | 1                    |         |
| Married                              | 82(49.40)                                     | 84(50.60) | 8.79 [1.09-70.91]      | 0.04    | 10.63 [1.11-101.95]  | 0.04    |
| <b>Relation with Household head</b>  |                                               |           |                        |         |                      |         |
| Household head                       | 28(48.28)                                     | 30(51.72) | 1                      |         |                      |         |
| Spouse                               | 53(47.45)                                     | 58(52.25) | 0.98 [0.52-1.85]       | 0.95    |                      |         |
| Others                               | 2(28.57)                                      | 5(71.43)  | 0.43 [0.08-2.39]       | 0.33    |                      |         |
| <b>Ethnicity</b>                     |                                               |           |                        |         |                      |         |
| Advantaged Ethnic Group              | 62(45.26)                                     | 75(54.74) | 1                      |         |                      |         |
| Disadvantaged Ethnic Group           | 21(53.85)                                     | 18(46.15) | 1.41 [0.69-2.88]       | 0.34    |                      |         |
| <b>Education of the respondent</b>   |                                               |           |                        |         |                      |         |
| No formal schooling                  | 9(33.33)                                      | 18(66.67) | 1                      |         | 1                    |         |
| Primary School                       | 18(45.00)                                     | 22(55.00) | 1.64 [0.59-4.51]       | 0.34    | 0.459 [0.12-1.71]    | 0.25    |
| Secondary school and higher          | 56(51.38)                                     | 53(48.62) | 2.11 [0.87-5.11]       | 0.09    | 0.64 [0.19-2.17]     | 0.48    |
| <b>Occupation other than farming</b> |                                               |           |                        |         |                      |         |
| Yes                                  | 29(43.28)                                     | 38(56.72) | 1                      |         |                      |         |
| No                                   | 54(49.54)                                     | 55(50.46) | 0.78 [0.42-1.43]       | 0.42    |                      |         |
| <b>Socioeconomic status</b>          |                                               |           |                        |         |                      |         |
| Rich                                 | 39(54.17)                                     | 33(45.83) | 1                      |         | 1                    |         |

|                                                    |           |           |                  |        |                    |      |
|----------------------------------------------------|-----------|-----------|------------------|--------|--------------------|------|
| Middle                                             | 28(42.42) | 38(57.58) | 0.62 [0.31-1.22] | 0.17   | 0.85 [0.32-2.24]   | 0.74 |
| Poor                                               | 16(42.11) | 22(57.89) | 0.62 [0.28-1.36] | 0.23   | 1.88 [0.54-6.52]   | 0.32 |
| <b>Households with &lt;5 years children</b>        |           |           |                  |        |                    |      |
| No                                                 | 57(46.34) | 66(53.66) | 1                |        |                    |      |
| Yes                                                | 26(49.06) | 27(50.94) | 1.12 [0.59-2.12] | 0.74   |                    |      |
| <b>Households with individual aged 60 or older</b> |           |           |                  |        |                    |      |
| No                                                 | 38(46.91) | 43(53.09) | 1                |        |                    |      |
| Yes                                                | 45(47.37) | 50(52.63) | 1.02 [0.56-1.84] | 0.95   |                    |      |
| <b>Households with pregnant women</b>              |           |           |                  |        |                    |      |
| Yes                                                | 79(47.88) | 86(52.12) | 1                |        |                    |      |
| No                                                 | 4(36.36)  | 7(63.64)  | 0.62 [0.18-2.21] | 0.46   |                    |      |
| <b>Years involved in farming</b>                   |           |           |                  |        |                    |      |
| <5 years                                           | 16(64)    | 9(36)     | 1                |        | 1                  |      |
| 5 to 10 years                                      | 24(48.98) | 25(51.02) | 0.54 [0.20-1.45] | 0.22   | 0.40 [0.10-1.61]   | 0.19 |
| >10 years                                          | 43(42.16) | 59(57.84) | 0.41 [0.17-1.01] | 0.05   | 0.26 [0.07-1.03]   | 0.05 |
| <b>Property Relationship</b>                       |           |           |                  |        |                    |      |
| I am the owner                                     | 38(38.78) | 60(61.22) | 1                |        | 1                  |      |
| I took the land in lease                           | 45(57.69) | 33(42.31) | 2.15 [1.17-3.95] | 0.013  | 0.83 [0.31-2.23]   | 0.72 |
| <b>Surface area of farmland</b>                    |           |           |                  |        |                    |      |
| <10952 sq. ft.                                     | 17(31.48) | 37(68.52) | 1                |        | 1                  |      |
| ≥10952 sq. ft.                                     | 66(54.10) | 56(45.90) | 2.57 [1.31-5.04] | 0.01   | 2.23 [0.96-5.21]   | 0.06 |
| <b>Purpose of vegetable farming</b>                |           |           |                  |        |                    |      |
| Self-consumption                                   | 27(34.18) | 52(65.82) | 1                |        | 1                  |      |
| Sell                                               | 56(57.73) | 41(42.27) | 2.63 [1.42-4.87] | <0.001 | 1.03 [0.41-2.61]   | 0.95 |
| <b>Years of pesticides used</b>                    |           |           |                  |        |                    |      |
| <5 years                                           | 33(42.31) | 45(57.69) | 1                |        | 1                  |      |
| 5 to 10 years                                      | 37(47.44) | 41(52.56) | 1.23 [0.65-2.31] | 0.52   | 1.72 [0.68-4.39]   | 0.25 |
| >10 years                                          | 13(65)    | 7(35)     | 2.53 [0.91-7.04] | 0.08   | 5.22 [1.27- 21.43] | 0.02 |
| <b>Times of vegetable grown in a year</b>          |           |           |                  |        |                    |      |
| 1 time                                             | 4(57.14)  | 3(42.86)  | 1                |        |                    |      |
| 2 times                                            | 46(46.46) | 53(53.54) | 0.65 [0.14-3.06] | 0.59   |                    |      |
| 3 times                                            | 33(47.14) | 37(52.86) | 0.67 [0.14-3.21] | 0.62   |                    |      |
| <b>Number of hours of pesticide exposure</b>       |           |           |                  |        |                    |      |

|                                        |           |           |                  |        |                   |       |
|----------------------------------------|-----------|-----------|------------------|--------|-------------------|-------|
| <10 hours                              | 55(39.86) | 83(60.14) | 1                |        | 1                 |       |
| ≥10 hours                              | 28(73.68) | 10(26.32) | 4.23 [1.90-9.39] | <0.001 | 4.86 [1.63-14.50] | 0.01  |
| <b>Methods of applying pesticides</b>  |           |           |                  |        |                   |       |
| Knapsack sprayer                       | 82(51.57) | 77(48.43) | 1                |        | 1                 |       |
| Others                                 | 1(5.88)   | 16(94.12) | 0.06 [0.01-0.45] | 0.01   | 0.03 [0.00-0.34]  | 0.004 |
| <b>Knowledge</b>                       |           |           |                  |        |                   |       |
| Poor                                   | 26(34.67) | 49(65.33) | 1                |        | 1                 |       |
| Good                                   | 57(56.44) | 44(43.56) | 2.44 [1.32-4.53] | 0.01   | 1.87 [0.81-4.33]  | 0.14  |
| <b>Attitude(N=176)</b>                 |           |           |                  |        |                   |       |
| Negative                               | 48(60.76) | 31(39.24) | 1                |        | 1                 |       |
| Positive                               | 35(36.08) | 62(63.92) | 0.36 [0.19-0.67] | <0.001 | 0.28 [0.11-0.70]  | 0.01  |
| <b>Training</b>                        |           |           |                  |        |                   |       |
| No                                     | 26(37.14) | 44(62.86) | 1                |        | 1                 |       |
| Yes                                    | 57(53.77) | 49(46.23) | 1.97 [1.06-3.65] | 0.03   | 1.68 [0.76-3.74]  | 0.20  |
| <b>Experience of illnesses (N=185)</b> |           |           |                  |        |                   |       |
| No                                     | 44(43.14) | 58(56.86) | 1                |        | 1                 |       |
| Yes                                    | 39(52.70) | 35(47.30) | 1.47 [0.80-2.68] | 0.21   | 0.91 [0.41-2.04]  | 0.82  |

## 228 Discussion

229 To the best of our understanding, this is the first study determining the knowledge, attitude,  
 230 practice, and associated factors of PPE use among farmers in Nepal, as previously most of them  
 231 had limited themselves to the safe handling of pesticides and illnesses resulting from pesticide  
 232 use [7,10,20–24]. This study also found that more than half of farmers had adequate knowledge  
 233 on the importance of PPE use and adverse effects of pesticides. This is quite different from other  
 234 studies conducted in Nepal which had reported that more than 80% of the farmers possessed  
 235 knowledge related to adverse health effects of pesticides, while, a study conducted in Thailand  
 236 had reported a much lower knowledge ratio i.e. 22.8%, the difference in the result might be  
 237 because most of these studies concentrated themselves with the study of harmful effects of

238 pesticides, while our study also focused on the use of PPE [7,22,25]. Also, while measuring the  
239 attitude of farmers towards use of PPE in this study, the findings are quite different from the  
240 findings revealed by a study conducted in Iran which reported less than half of the farmer's  
241 intended to use PPE while handling pesticides [26].

242 Pesticides can enter the body through various routes like ingestion, inhalation, and skin  
243 absorption thus wearing a combination of PPE is crucial in order to minimize this exposure [9]. Our  
244 study showed that, almost all the farmers were wearing at least one form of PPE while handling  
245 pesticides but when it came to wearing a combination of PPE, less than half of the population  
246 were found to be wearing mask, gloves and boot at the same time which is considered as the  
247 basic set of PPE, the proportion was similar to a study conducted in Brazil [27]. This prevalence  
248 revealed by our study is higher in Nepal, than in countries like Ethiopia (10%) and Thailand (6%)  
249 [25,28]. Further, other studies conducted in other parts of Nepal in various years showed a  
250 comparatively lower proportion of PPE use as compared to our study [20,22,23]. The possible  
251 reason behind this might be due to the fact that our study was conducted post COVID while other  
252 studies were conducted before the pandemic [20,22,23]. The COVID pandemic heightened the  
253 awareness about PPE for disease prevention and led to the heightened demand and usage of  
254 PPE. The increase in production and distribution led to an increased availability, leading to an  
255 increased proportion of PPE use among farmers in our study [29]. However, it is contradicting, as  
256 our study also showed that more than half of the population of farmers do not use basic set of  
257 PPE while handling pesticides, which implies that farmers in Nepal are still at high risk of  
258 developing various pesticide-related-illnesses.



259 Further, association between education levels and knowledge regarding PPE use among farmers  
260 also constitutes a notable finding in this study. This association is in line with previous studies  
261 highlighting the influential role of education in shaping safety practices in various occupational  
262 settings [30,31]. Higher levels of education are often linked with enhanced access to formalized  
263 information channels, including agricultural training programs and workshops. These avenues  
264 offer a platform for disseminating critical safety information, including the proper use of PPE.  
265 Additionally, farmers with higher educational attainment may possess superior cognitive  
266 abilities, potentially affording them a greater capacity to comprehend and retain safety-related  
267 information [30,31].

268 In addition to that, this study also showed a significant association between lower socioeconomic  
269 status and attitudes towards PPE use among farmers. This finding is in alignment with existing  
270 literature, which underscores the intricate interplay between economic resources and safety  
271 practices in occupational settings [32,33]. Farmers with limited financial means may encounter  
272 barriers in adopting favorable attitudes towards PPE use [33]. Financial constraints often hinder  
273 their capacity to invest in safety equipment, diverting resources towards more immediate needs.  
274 Moreover, this association may be exacerbated by a lack of access to formalized safety training  
275 programs and information materials, which are crucial for cultivating positive attitudes towards  
276 safety practices. Moreover, a noteworthy observation emerged from the study, indicating that  
277 farmers who reported instances of illness exhibited lower odds of holding favorable attitudes  
278 towards the use of PPE. This finding resonates with prior research emphasizing the multifaceted  
279 relationship between health status and safety practices in agricultural contexts [25,32].

280 Farmers who have experienced illness may also, understandably, face heightened challenges in  
281 maintaining a positive outlook towards PPE. Illness can lead to physical discomfort, diminished  
282 work capacity, and potentially increased economic strain due to healthcare expenses. Such  
283 circumstances may divert attention and resources away from investing in protective gear [34].  
284 Additionally, farmers who have personally encountered health issues may possess a different  
285 perception of occupational risks, potentially underestimating the imperative nature of PPE [26].

286 Our study also finds an intriguing finding that needs to be interpreted cautiously, the knowledge  
287 on PPE use being associated with lower odds of positive attitudes towards its PPE use. This  
288 counterintuitive relationship prompts closer examination of potential underlying factors. Firstly,  
289 it is relatable that farmers with extensive knowledge of PPE may, paradoxically, become  
290 cognizant of its limitations or discomforts in practical application. This heightened awareness  
291 may lead to a more relaxed attitude towards its use. Additionally, the excess of knowledge may  
292 inadvertently lead to complacency, as farmers might overestimate their proficiency in  
293 implementing safety measures, potentially reducing the perceived necessity of consistent PPE  
294 adherence. Furthermore, it is crucial to consider that attitudes towards safety practices are  
295 influenced by a lot of factors. Socio-cultural norms, personal experiences, and contextual  
296 constraints play pivotal roles in shaping these attitudes [35,36].

297 The marital status of farmers, their years involved in farming, years of pesticide use, number of  
298 hours of pesticide exposed, methods of applying pesticides, and their attitude towards PPE use  
299 were all found to be associated with practice related to PPE use. The farmers who were married  
300 were more likely to wear PPE while working with pesticides which is consistent with the study

301 conducted in Cameroon [30]. A plausible explanation for this might be that the married  
302 individuals have a heightened sense of responsibilities towards their family, having any form of  
303 illness not only affects the individuals but also adds financial burden to their family therefore  
304 they might adhere to adopt responsible behaviors like wearing PPE while handling pesticides.  
305 Likewise, their spouse and other family members may also encourage and pressurize them to  
306 adopt precautionary measures.

307 Further, the odds of using PPE were found to be substantially lower among the farmers who were  
308 involved in farming for more than 10 years. A similar finding was seen in a study conducted in  
309 India where the farmers who had mean 18 years old farming exposure were not following safety  
310 practices [29]. This could be because those farmers may have developed sense of confidence in  
311 their work and have less perceived risk in their work by underestimating the potential hazard of  
312 pesticide and have a false belief that they can manage the risk without the use of PPE.

313 However, unlike the years involved in farming, the farmers who were using pesticides for more  
314 than 10 years had higher odds of using PPE. The plausible reason behind this may be because the  
315 farmers who were using pesticides for a longer time might be more familiar with the potential  
316 health hazards or might have experienced side effects and may be more familiar about the safety  
317 measures to reduce the risk. Moreover, as farmers accumulate years of experience, they often  
318 become more attuned to industry recommendations and regulatory guidelines regarding safety  
319 practices [29]. Likewise, the farmers who were exposed to pesticides for 10 hours or more in their  
320 lifetime were more likely to use PPE. This might be because the farmers might perceive that an

321 exposure to pesticides for a longer period can cause deleterious effects which has also been  
322 mentioned in theory of toxicology [29,31].

323 Additionally, the finding that positive attitude was associated with lower odds of PPE use among  
324 farmers presents an intriguing and potentially counterintuitive observation. A similar finding was  
325 also presented in a study conducted in Ethiopia [27]. This result may be elucidated by several  
326 factors outlined in existing literature. Firstly, individuals with an optimistic outlook towards their  
327 work environment may exhibit a heightened perception of safety and reduced perceived risk,  
328 potentially diminishing the perceived necessity for PPE. This phenomenon, known as the  
329 "optimism bias," has been documented in various occupational contexts, where individuals tend  
330 to underestimate their personal susceptibility to negative events [32]. Moreover, positive  
331 attitude may inadvertently lead to overconfidence, as farmers may believe that their positive  
332 outlook alone is sufficient to mitigate potential risks, thereby diminishing their motivation to  
333 engage in precautionary measures like PPE use. Additionally, socio-cultural factors and peer  
334 influence may play a pivotal role in shaping attitudes towards safety practices; downplaying the  
335 necessity of PPE use [33,34]. This result underscores the importance of considering not only  
336 attitudes but also their potential impact on behavior. It emphasizes the need for targeted  
337 interventions that address the complex interplay between attitudes, risk perception, and actual  
338 safety practices to ensure optimal PPE utilization among farmers.

339 This study also has some limitations. Firstly, the interviews were conducted through telephone  
340 considering safety protocols during the COVID-19 pandemic; therefore, the responses are  
341 subjected to differ from face-to-face interviews as the communication might have been subject

342 to various interference like lack of visual cues, body language and time constraint which might  
343 have influenced the data and the study. Further, the pandemic increased the use of masks among  
344 people and since this study is also related to the use of PPE, the situation may also have  
345 influenced the result of the current study.

## 346 **Conclusion**

347 In conclusion, this study provides valuable insights into the factors influencing the adoption of  
348 PPE among farmers. The association between education and knowledge on PPE underscores the  
349 pivotal role of formalized education in promoting safety awareness and practices within the  
350 agricultural community. Additionally, the association between lower socioeconomic status and  
351 attitudes towards PPE highlights the need for targeted interventions to address economic  
352 barriers and ensure equitable access to protective gear. Furthermore, the finding that farmers  
353 who have experienced illness exhibit lower odds of positive attitudes towards PPE emphasizes  
354 the importance of considering health status as a determinant of safety behaviors. Moreover, the  
355 positive relationship between years of pesticide uses and increased PPE utilization highlights the  
356 evolution of safety consciousness over time, underlining the value of experiential learning in  
357 shaping responsible pesticide handling behaviors. This study has several implications for policy  
358 and practice. It underscores the need for tailored educational programs that consider the diverse  
359 educational backgrounds and experiences of farmers. Additionally, targeted interventions  
360 addressing economic constraints and health status are crucial in promoting consistent PPE use.

361 Finally, efforts to foster a culture of safety within the agricultural sector should encompass not  
362 only knowledge dissemination but also the cultivation of positive safety attitudes.

## 363 **Acknowledgments**

364 We would like to express our gratitude to Professor Shital Bhandary, School of Public Health,  
365 Patan Academy of Health Sciences for the support during data analysis. Additionally, we thank  
366 Kirtipur Municipality for allowing us to conduct the study.

## 367 **References**

- 368 1. Sharma A, Kumar V, Shahzad B, Tanveer M, Sidhu GPS, Handa N, et al. Worldwide pesticide  
369 usage and its impacts on ecosystem. *SN Appl Sci*. 2019;1: 1–16. doi:10.1007/s42452-019-  
370 1485-1
- 371 2. Joshi SK. Pesticides poisoning in Nepal. *Kathmandu Univ Med J (KUMJ)*. 2003;1: 157.  
372 Available:  
373 [https://www.researchgate.net/publication/7383585\\_Pesticides\\_poisoning\\_in\\_Nepal](https://www.researchgate.net/publication/7383585_Pesticides_poisoning_in_Nepal)
- 374 3. Diwakar J, Prasai T, Pant SR, Jayana BL. Study on Major Pesticides and Fertilizers used in  
375 Nepal. *Scientific World*. 1970;6: 76–80. doi:10.3126/sw.v6i6.2638
- 376 4. Gyawali K. Pesticide Uses and its Effects on Public Health and Environment. *Journal of*  
377 *Health Promotion*. 2018;6: 28–36. doi:10.3126/jhp.v6i0.21801
- 378 5. Central Bureau of Statistics. National Sample Census of Agriculture Nepal. 2013; 114.
- 379 6. Atreya K, Sitaula BK. Mancozeb: growing risk for agricultural communities? *Himalayan*  
380 *Journal of Sciences*. 2011;6: 9–10. doi:10.3126/hjs.v6i8.1794
- 381 7. Aryal KK, Neupane S, Lohani GR, Jors E, Neupane D, Khanal PR, Jha BK, Dhimal M, Shrestha  
382 BM, Bista B, Poudyal A A, KB K. Health Effects of Pesticide among Vegetable Farmers and  
383 the Adaptation Level of Integrated Pest Management Program in Nepal , 2014. Nepal  
384 Health Research Council, 2016. 2014; 1–3. Available: [http://nhrc.gov.np/wp-](http://nhrc.gov.np/wp-content/uploads/2017/06/pesticide-report_setting.pdf)  
385 [content/uploads/2017/06/pesticide-report\\_setting.pdf](http://nhrc.gov.np/wp-content/uploads/2017/06/pesticide-report_setting.pdf)

- 386 8. Weisenburger DD. Human health effects of agrichemical use. *Hum Pathol.* 1993;24: 571–  
387 576. doi:10.1016/0046-8177(93)90234-8
- 388 9. Kim KH, Kabir E, Jahan SA. Exposure to pesticides and the associated human health effects.  
389 *Science of the Total Environment.* 2017;575: 525–535.  
390 doi:10.1016/j.scitotenv.2016.09.009
- 391 10. Atreya K, Rijal C, Neupane P. Pesticide use in agriculture and chronic health conditions: A  
392 survey-based cross-sectional study in Nepal. *Archives of Agriculture and Environmental*  
393 *Science.* 2020;5: 489–497. doi:10.26832/24566632.2020.050409
- 394 11. Yarpuz-Bozdogan N. The importance of personal protective equipment in pesticide  
395 applications in agriculture. *Curr Opin Environ Sci Health.* 2018;4: 1–4.  
396 doi:10.1016/j.coesh.2018.02.001
- 397 12. Khan M. Using the Health Belief Model to understand pesticide use decisions. *Pak Dev Rev.*  
398 2010;49: 941–956. doi:10.30541/v49i4iipp.941-956
- 399 13. Harirar Bhawan L. Study on national pesticide consumption statistics in Nepal. Ministry of  
400 Agriculture, Government of Nepal. 2014; 1–84.
- 401 14. Weigel R. Solutions for Living: Personal Protective Equipment for Agriculture. 2012.  
402 Available: <http://www.wyomingextension.org/agpubs/pubs/B1233.pdf>
- 403 15. Karmacharya S. Pesticide Use In Agriculture And Its Socio- Economic Contexts, A Case  
404 Study of Panchkhal Area, Kavre, Nepal. *International Journal of Scientific & Technology*  
405 *Research.* 2012;1: 17–20.



- 406 16. Shrestha P, Koirala P, Tamrakar AS. Knowledge, Practice and Use of Pesticides among  
407 Commercial Vegetable Growers of Dhading District, Nepal. *Journal of Agriculture and*  
408 *Environment*. 2010;11: 95–100. doi:10.3126/aej.v11i0.3656
- 409 17. Sapbamrer R, Thammachai A. Factors affecting use of personal protective equipment and  
410 pesticide safety practices: A systematic review. *Environ Res*. 2020;185: 109444.  
411 doi:10.1016/j.envres.2020.109444
- 412 18. Thapa S, Thapa B, Bhandari R, Jamkatel D, Acharya P, Rawal S, et al. Knowledge on Pesticide  
413 Handling Practices and Factors Affecting Adoption of Personal Protective Equipment: A  
414 Case of Farmers from Nepal. *Advances in Agriculture*. 2021;2021.  
415 doi:10.1155/2021/5569835
- 416 19. Anas M. Which Predisposing Factors Influence The Farmers in Compliance of Personal  
417 Protective Equipment (PPE)? *Indian Journal of Forensic Medicine & Toxicology*. 2021.  
418 doi:10.37506/ijfmt.v15i2.14889
- 419 20. Khanal, Gayatri S. Patterns of Pesticide Use and Associated Factors Among the Commercial  
420 Farmers of Chitwan, Nepal. doi:10.1177/EHI.S40973
- 421 21. Basnet N, Chidi CL. Impact of Pesticide and Fertilizer on Human Health: A Case Study in  
422 Godawari Area, Lalitpur, Nepal. *The Geographic Base*. 2019;6: 65–76.  
423 doi:10.3126/tgb.v6i0.26168

- 424 22. Humagain N, Humagain N, Maharjan K, Sah AK, Neupane J. Knowledge and Practice of  
425 Pesticides among the Farmer of Bhaktapur Municipality, Nepal. 2019; 1–10.  
426 doi:10.21203/rs.2.18419/v1
- 427 23. Major insect pests and pesticide used practices among tomato growers in Kathmandu and  
428 Bhaktapur districts.pdf. Available: [https://ppsnepal.com/sites/default/files/18\\_Tomato](https://ppsnepal.com/sites/default/files/18_Tomato_insectpest_and_pesticides%2C_J_Plant_Proct._Soc._Vol._6%2C_2020.pdf)  
429 [insectpest and pesticides%2C J. Plant Proct. Soc. Vol. 6%2C 2020.pdf](https://ppsnepal.com/sites/default/files/18_Tomato_insectpest_and_pesticides%2C_J_Plant_Proct._Soc._Vol._6%2C_2020.pdf)
- 430 24. Thapa A, Tamrakar AS, Subedi IP. Pesticide Use Practices Among Tomato Growers in Kavre  
431 District, Nepal. Nepalese Journal of Zoology. 2015;3: 17–23. doi:10.3126/njz.v3i1.30861
- 432 25. Siriwong S, Siripattanakul W, Robson S. Knowledge, Attitude, and Practice (KAP) of Using  
433 Personal Protective Equipment (PPE) for Chilli-Growing Farmers in Huarua Sub-district,  
434 Mueang District. J Health Res. 2010;24: 93–100. Available:  
435 [https://scholarship.libraries.rutgers.edu/discovery/delivery/01RUT\\_INST:ResearchReposi](https://scholarship.libraries.rutgers.edu/discovery/delivery/01RUT_INST:ResearchRepository/12643442910004646?l#13643539200004646Norkaew)  
436 [tory/12643442910004646?l#13643539200004646Norkaew,](https://scholarship.libraries.rutgers.edu/discovery/delivery/01RUT_INST:ResearchRepository/12643442910004646?l#13643539200004646Norkaew)
- 437 26. Abdollahzadeh G, Sharifzadeh MS. Predicting farmers' intention to use PPE for prevent  
438 pesticide adverse effects: An examination of the Health Belief Model (HBM). Journal of the  
439 Saudi Society of Agricultural Sciences. 2021;20: 40–47. doi:10.1016/j.jssas.2020.11.001
- 440 27. Pasioni JO, Torres P, Silva JR, Diniz BZ, Caldas ED. Knowledge, attitudes, practices and  
441 biomonitoring of farmers and residents exposed to pesticides in Brazil. Int J Environ Res  
442 Public Health. 2012;9: 3051–3068. doi:10.3390/ijerph9093051

- 443 28. Negatu B, Kromhout H, Mekonnen Y, Vermeulen R. Use of chemical pesticides in Ethiopia:  
444 A cross-sectional comparative study Onknowledge, attitude and practice of farmers and  
445 farm workers in three farming systems. *Annals of Occupational Hygiene*. 2016;60: 551–  
446 566. doi:10.1093/annhyg/mew004
- 447 29. Hayati A. Safety behavior of agricultural workers around face mask-wearing during the  
448 COVID-19 pandemic. *Work*. 2022;74: 371–379. doi:10.3233/WOR-220205
- 449 30. Öztaş D, Kurt B, Koç A, Akbaba M, Ilter H. Knowledge level, attitude, and behaviors of  
450 farmers in çukurova region regarding the use of pesticides. *Biomed Res Int*. 2018;2018.  
451 doi:10.1155/2018/6146509
- 452 31. Zyoud SH, Sawalha AF, Sweileh WM, Awang R, Al-Khalil SI, Al-Jabi SW, et al. Knowledge  
453 and practices of pesticide use among farm workers in the West Bank, Palestine: Safety  
454 implications. *Environ Health Prev Med*. 2010;15: 252–261. doi:10.1007/s12199-010-0136-  
455 3
- 456 32. Gesesew HA, Woldemichael K, Massa D, Mwanri L. Farmers knowledge, attitudes,  
457 practices and health problems associated with pesticide use in rural irrigation villages,  
458 Southwest Ethiopia. *PLoS One*. 2016;11. doi:10.1371/journal.pone.0162527
- 459 33. Migheli M. Income, wealth and use of personal protection equipment in the Mekong Delta.  
460 doi:10.1007/s11356-021-13449-w/Published

- 461 34. Sookhtanlou M, Allahyari MS. Farmers' health risk and the use of personal protective  
462 equipment (PPE) during pesticide application. *Environmental Science and Pollution*  
463 *Research*. 2021;28: 28168–28178. doi:10.1007/s11356-021-12502-y
- 464 35. Franklin R, Levy I, Lisandro Signorini M, Mohammadrezaei M, Meredith D. Do social  
465 influences, awareness, or experience matter? Toward a better understanding of Farm-  
466 related Injury Risk Perception among agricultural science college students in Ireland.
- 467 36. Garrigou A, Laurent C, Berthet A, Colosio C, Jas N, Daubas-Letourneux V, et al. Critical  
468 review of the role of PPE in the prevention of risks related to agricultural pesticide use.  
469 *Safety Science*. Elsevier B.V.; 2020. doi:10.1016/j.ssci.2019.104527
- 470
